# Supplementary material
Source: Springer Nature journal article supplement (https://www.springermedizin.de/resource/supplementary/13058_2013_3581_MOESM5_ESM.pdf/9703860)

**(A) Luminal A**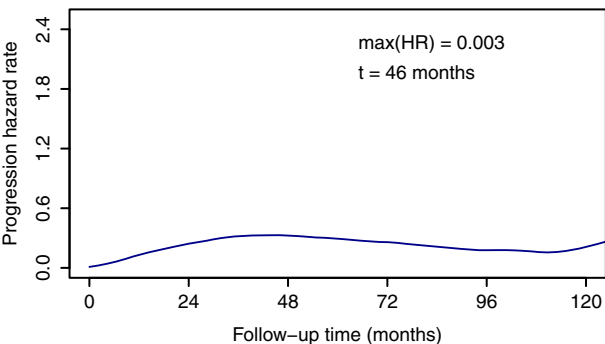**(B) Luminal B**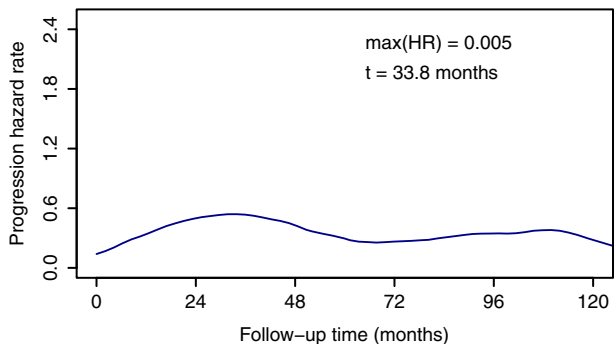**(C) Luminal-HER2**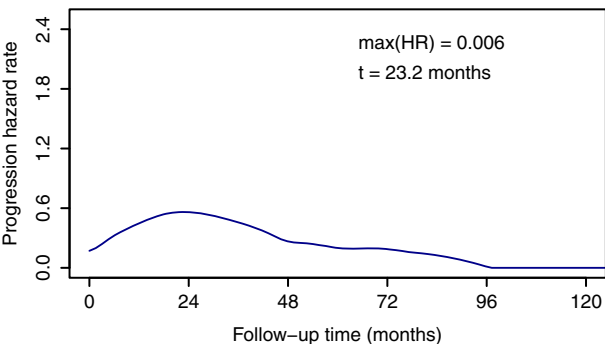**(D) HER2 enriched**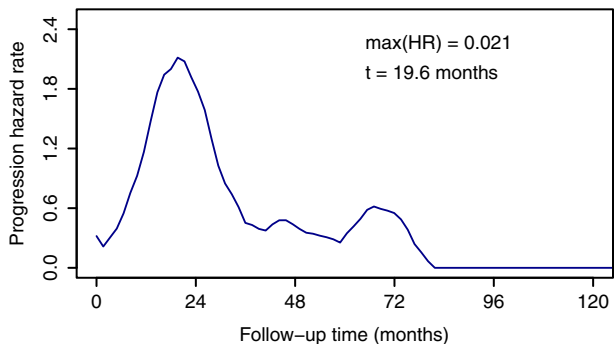**(E) Basal like**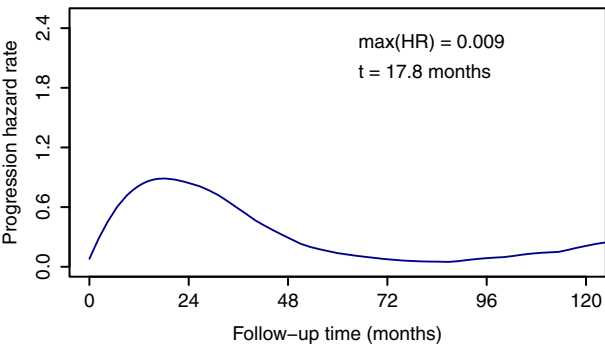**(F) TNP-nonbasal**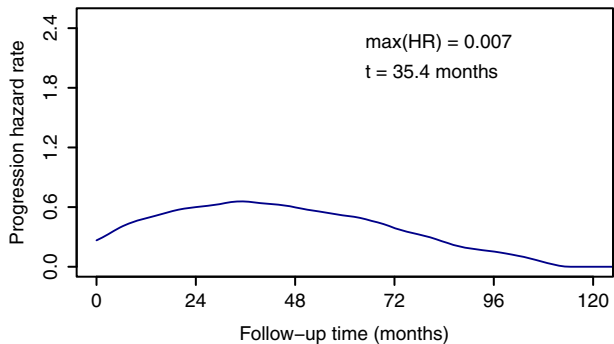

Supplement: MOESM5 [file 9703860]
